# Supplementary material for: Choline Supplementation Alters Hippocampal Cytokine Levels in Adolescence and Adulthood in an Animal Model of Fetal Alcohol Spectrum Disorders
Source: MDPI journal article supplement (doi:10.3390/cells12040546), 2023-02-08
Supplement: s1 [file s1]

Supplemental Table S1. Hippocampal Cytokine Levels in Males and Females

| Exposure Group | Sex      | Cytokine Levels (pg/mg; M ± SEM [n]) |                         |                         |                         |                          |                          |                         |                         |                         |                         |                         |                         |                         |                         |                         |                         |                         |                         |
|----------------|----------|--------------------------------------|-------------------------|-------------------------|-------------------------|--------------------------|--------------------------|-------------------------|-------------------------|-------------------------|-------------------------|-------------------------|-------------------------|-------------------------|-------------------------|-------------------------|-------------------------|-------------------------|-------------------------|
|                |          | IL-4                                 | IL-4                    | IL-5                    | IL-5                    | IL-6                     | IL-6                     | IL-10                   | IL-10                   | IL-13                   | IL-13                   | IFN- $\gamma$           | IFN- $\gamma$           | IL-1 $\beta$            | IL-1 $\beta$            | KC/GRO                  | KC/GRO                  | TNF- $\alpha$           | TNF- $\alpha$           |
|                |          | Adolescent                           | Adult                   | Adolescent              | Adult                   | Adolescent               | Adult                    | Adolescent              | Adult                   | Adolescent              | Adult                   | Adolescent              | Adult                   | Adolescent              | Adult                   | Adolescent              | Adult                   | Adolescent              | Adult                   |
| Sham + Saline  | Females: | 0.00 ± 0.00<br>[n = 10]              | 0.00 ± 0.00<br>[n = 12] | 1.24 ± 0.35<br>[n = 10] | 0.25 ± 0.14<br>[n = 12] | 15.08 ± 0.96<br>[n = 10] | 7.27 ± 1.32<br>[n = 12]  | 0.08 ± 0.05<br>[n = 10] | 0.00 ± 0.00<br>[n = 12] | 0.05 ± 0.02<br>[n = 10] | 0.03 ± 0.01<br>[n = 12] | 0.67 ± 0.10<br>[n = 10] | 0.16 ± 0.03<br>[n = 12] | 4.83 ± 0.84<br>[n = 10] | 0.16 ± 0.09<br>[n = 12] | 2.74 ± 0.26<br>[n = 10] | 3.28 ± 0.43<br>[n = 12] | 0.13 ± 0.01<br>[n = 10] | 0.08 ± 0.01<br>[n = 12] |
|                | Males:   | 0.00 ± 0.00<br>[n = 9]               | 0.00 ± 0.00<br>[n = 12] | 0.95 ± 0.30<br>[n = 9]  | 0.18 ± 0.12<br>[n = 12] | 13.03 ± 0.98<br>[n = 9]  | 11.06 ± 1.92<br>[n = 12] | 0.06 ± 0.06<br>[n = 9]  | 0.00 ± 0.00<br>[n = 12] | 0.02 ± 0.02<br>[n = 9]  | 0.03 ± 0.01<br>[n = 12] | 0.51 ± 0.07<br>[n = 9]  | 0.22 ± 0.04<br>[n = 12] | 3.55 ± 0.55<br>[n = 9]  | 0.14 ± 0.10<br>[n = 12] | 2.48 ± 0.21<br>[n = 9]  | 2.12 ± 0.41<br>[n = 12] | 0.13 ± 0.02<br>[n = 9]  | 0.09 ± 0.02<br>[n = 12] |
| Sham + Choline | Females: | 0.00 ± 0.00<br>[n = 10]              | 0.00 ± 0.00<br>[n = 12] | 0.82 ± 0.23<br>[n = 10] | 0.46 ± 0.24<br>[n = 12] | 14.01 ± 0.88<br>[n = 10] | 9.46 ± 2.18<br>[n = 12]  | 0.01 ± 0.01<br>[n = 10] | 0.03 ± 0.03<br>[n = 12] | 0.01 ± 0.01<br>[n = 10] | 0.03 ± 0.02<br>[n = 12] | 0.52 ± 0.06<br>[n = 10] | 0.19 ± 0.02<br>[n = 12] | 3.85 ± 0.48<br>[n = 10] | 0.13 ± 0.13<br>[n = 12] | 2.85 ± 0.43<br>[n = 10] | 2.63 ± 0.49<br>[n = 12] | 0.13 ± 0.01<br>[n = 10] | 0.11 ± 0.02<br>[n = 12] |
|                | Males:   | 0.00 ± 0.00<br>[n = 9]               | 0.00 ± 0.00<br>[n = 11] | 0.81 ± 0.22<br>[n = 9]  | 0.00 ± 0.00<br>[n = 11] | 13.32 ± 0.74<br>[n = 9]  | 8.08 ± 2.68<br>[n = 11]  | 0.02 ± 0.02<br>[n = 9]  | 0.08 ± 0.08<br>[n = 11] | 0.01 ± 0.01<br>[n = 9]  | 0.05 ± 0.04<br>[n = 11] | 0.43 ± 0.03<br>[n = 9]  | 0.26 ± 0.05<br>[n = 11] | 3.10 ± 0.25<br>[n = 9]  | 0.14 ± 0.09<br>[n = 11] | 2.56 ± 0.16<br>[n = 9]  | 2.72 ± 0.60<br>[n = 11] | 0.15 ± 0.01<br>[n = 9]  | 0.10 ± 0.02<br>[n = 11] |
| EtOH + Saline  | Females: | 0.00 ± 0.00<br>[n = 10]              | 0.00 ± 0.00<br>[n = 10] | 1.52 ± 0.27<br>[n = 10] | 0.44 ± 0.29<br>[n = 10] | 17.24 ± 1.77<br>[n = 10] | 11.07 ± 3.05<br>[n = 10] | 0.05 ± 0.05<br>[n = 10] | 0.08 ± 0.08<br>[n = 10] | 0.01 ± 0.01<br>[n = 10] | 0.10 ± 0.05<br>[n = 10] | 0.69 ± 0.09<br>[n = 10] | 0.37 ± 0.08<br>[n = 10] | 5.32 ± 0.87<br>[n = 10] | 0.61 ± 0.39<br>[n = 10] | 2.64 ± 0.23<br>[n = 10] | 2.91 ± 0.57<br>[n = 10] | 0.12 ± 0.02<br>[n = 10] | 0.15 ± 0.04<br>[n = 10] |
|                | Males:   | 0.00 ± 0.00<br>[n = 8]               | 0.00 ± 0.00<br>[n = 9]  | 1.03 ± 0.28<br>[n = 8]  | 0.65 ± 0.38<br>[n = 9]  | 15.11 ± 0.92<br>[n = 8]  | 13.10 ± 4.02<br>[n = 9]  | 0.08 ± 0.04<br>[n = 8]  | 0.13 ± 0.10<br>[n = 9]  | 0.01 ± 0.01<br>[n = 8]  | 0.10 ± 0.06<br>[n = 9]  | 0.51 ± 0.06<br>[n = 8]  | 0.35 ± 0.06<br>[n = 9]  | 4.10 ± 0.87<br>[n = 8]  | 0.45 ± 0.34<br>[n = 9]  | 2.48 ± 0.37<br>[n = 8]  | 3.60 ± 0.69<br>[n = 9]  | 0.14 ± 0.02<br>[n = 8]  | 0.18 ± 0.04<br>[n = 9]  |
| EtOH + Choline | Females: | 0.00 ± 0.00<br>[n = 10]              | 0.00 ± 0.00<br>[n = 11] | 0.78 ± 0.31<br>[n = 10] | 0.38 ± 0.22<br>[n = 11] | 16.91 ± 2.11<br>[n = 10] | 11.00 ± 1.52<br>[n = 11] | 0.05 ± 0.05<br>[n = 10] | 0.00 ± 0.00<br>[n = 11] | 0.02 ± 0.01<br>[n = 10] | 0.07 ± 0.04<br>[n = 11] | 0.60 ± 0.09<br>[n = 10] | 0.21 ± 0.03<br>[n = 11] | 4.61 ± 0.83<br>[n = 10] | 0.13 ± 0.13<br>[n = 11] | 2.50 ± 0.21<br>[n = 10] | 3.09 ± 0.32<br>[n = 11] | 0.13 ± 0.01<br>[n = 10] | 0.12 ± 0.01<br>[n = 11] |
|                | Males:   | 0.00 ± 0.00<br>[n = 9]               | 0.00 ± 0.00<br>[n = 10] | 0.85 ± 0.18<br>[n = 9]  | 0.11 ± 0.11<br>[n = 10] | 13.89 ± 0.95<br>[n = 9]  | 13.04 ± 3.11<br>[n = 10] | 0.02 ± 0.02<br>[n = 9]  | 0.00 ± 0.00<br>[n = 10] | 0.00 ± 0.00<br>[n = 9]  | 0.03 ± 0.02<br>[n = 10] | 0.48 ± 0.05<br>[n = 9]  | 0.19 ± 0.05<br>[n = 10] | 3.40 ± 0.43<br>[n = 9]  | 0.58 ± 0.49<br>[n = 10] | 2.36 ± 0.17<br>[n = 9]  | 3.27 ± 0.29<br>[n = 10] | 0.13 ± 0.02<br>[n = 9]  | 0.13 ± 0.02<br>[n = 10] |
